# Supplementary material for: Quantitative proteomic characterization of cellular pathways associated with altered insulin sensitivity in skeletal muscle following high-fat diet feeding and exercise training
Source: Springer Nature journal article supplement (doi:10.1038/s41598-018-28540-5), 2018-07-10

# **Quantitative proteomic characterization of cellular pathways associated with altered insulin sensitivity in skeletal muscle following high-fat diet feeding and exercise training**

Maximilian Kleinert<sup>1,2,3,4</sup>, Benjamin L. Parker<sup>5</sup>, Thomas E. Jensen<sup>1</sup>, Steffen H. Raun, Phung Pham<sup>2</sup>, Xiuqing Han<sup>1</sup>, David E. James<sup>5</sup>, Erik A. Richter<sup>1</sup>, Lykke Sylow<sup>1#</sup>

## **Supplemental Info – Raw Blots related to Figure 4**

ACOT13

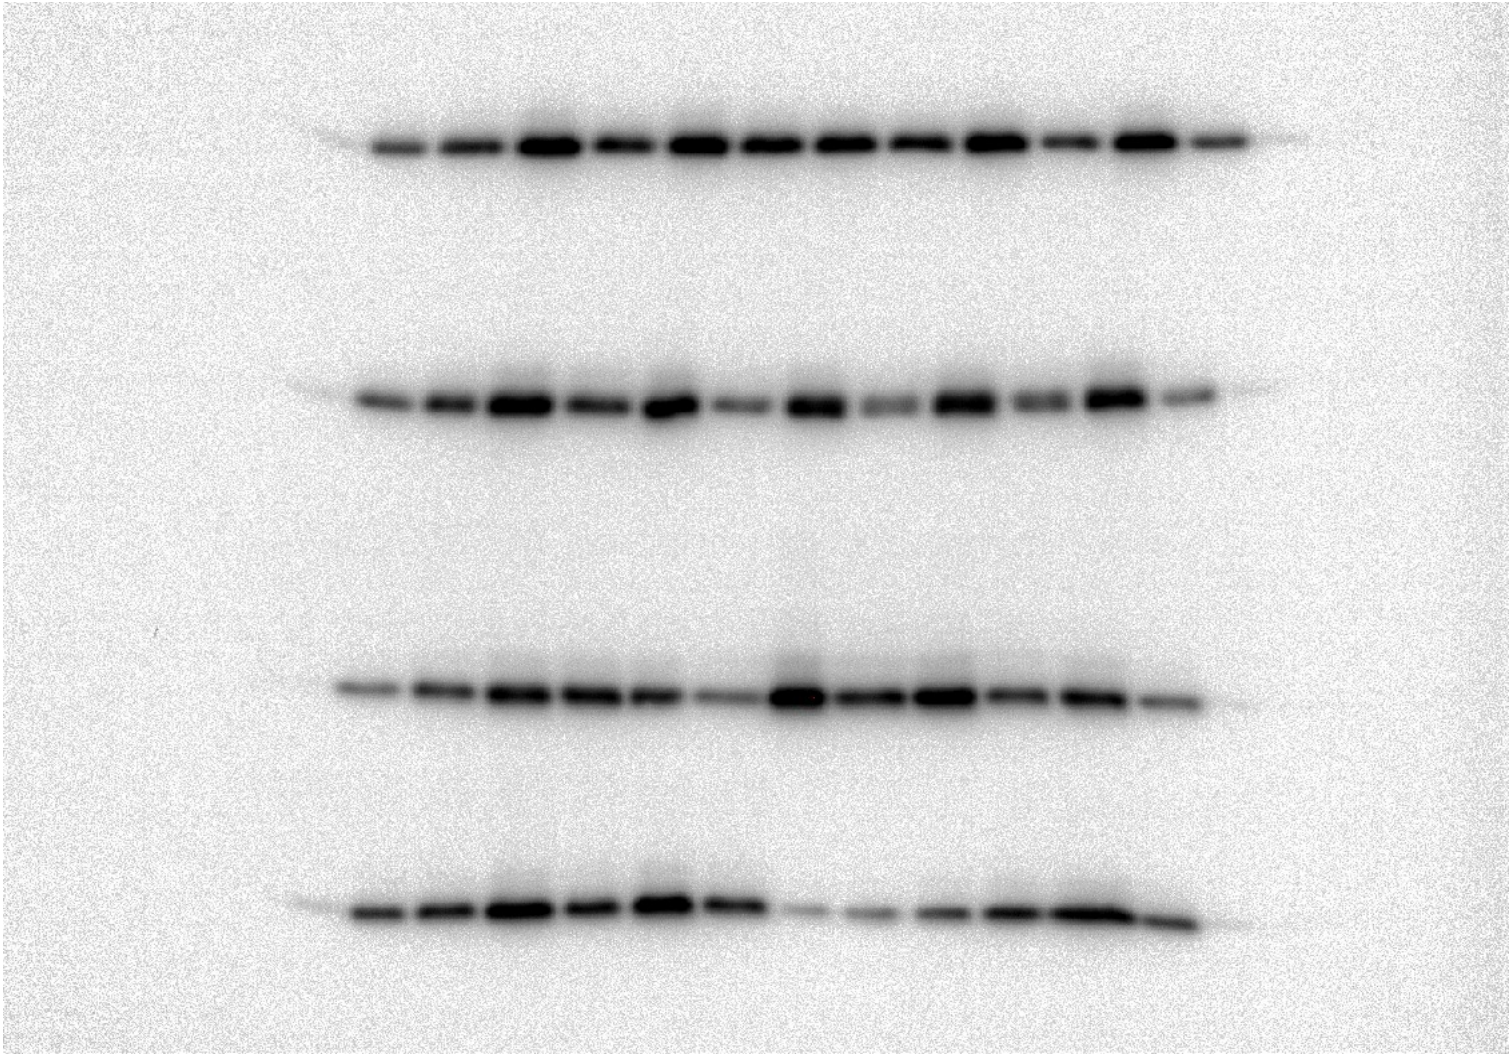

SLIRP

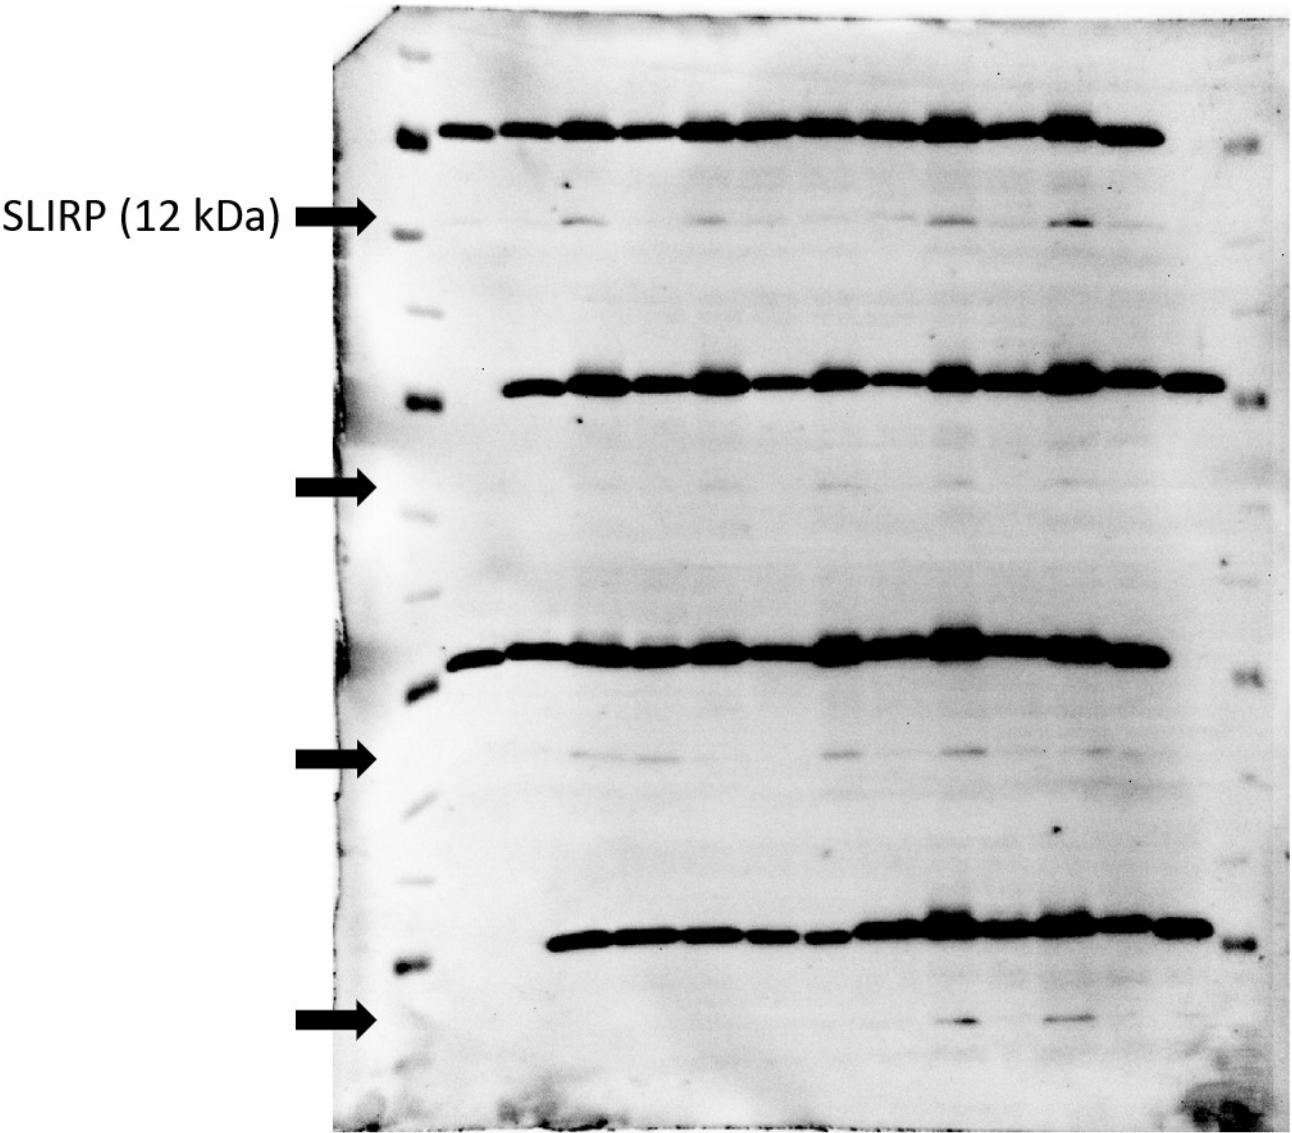

MUP1

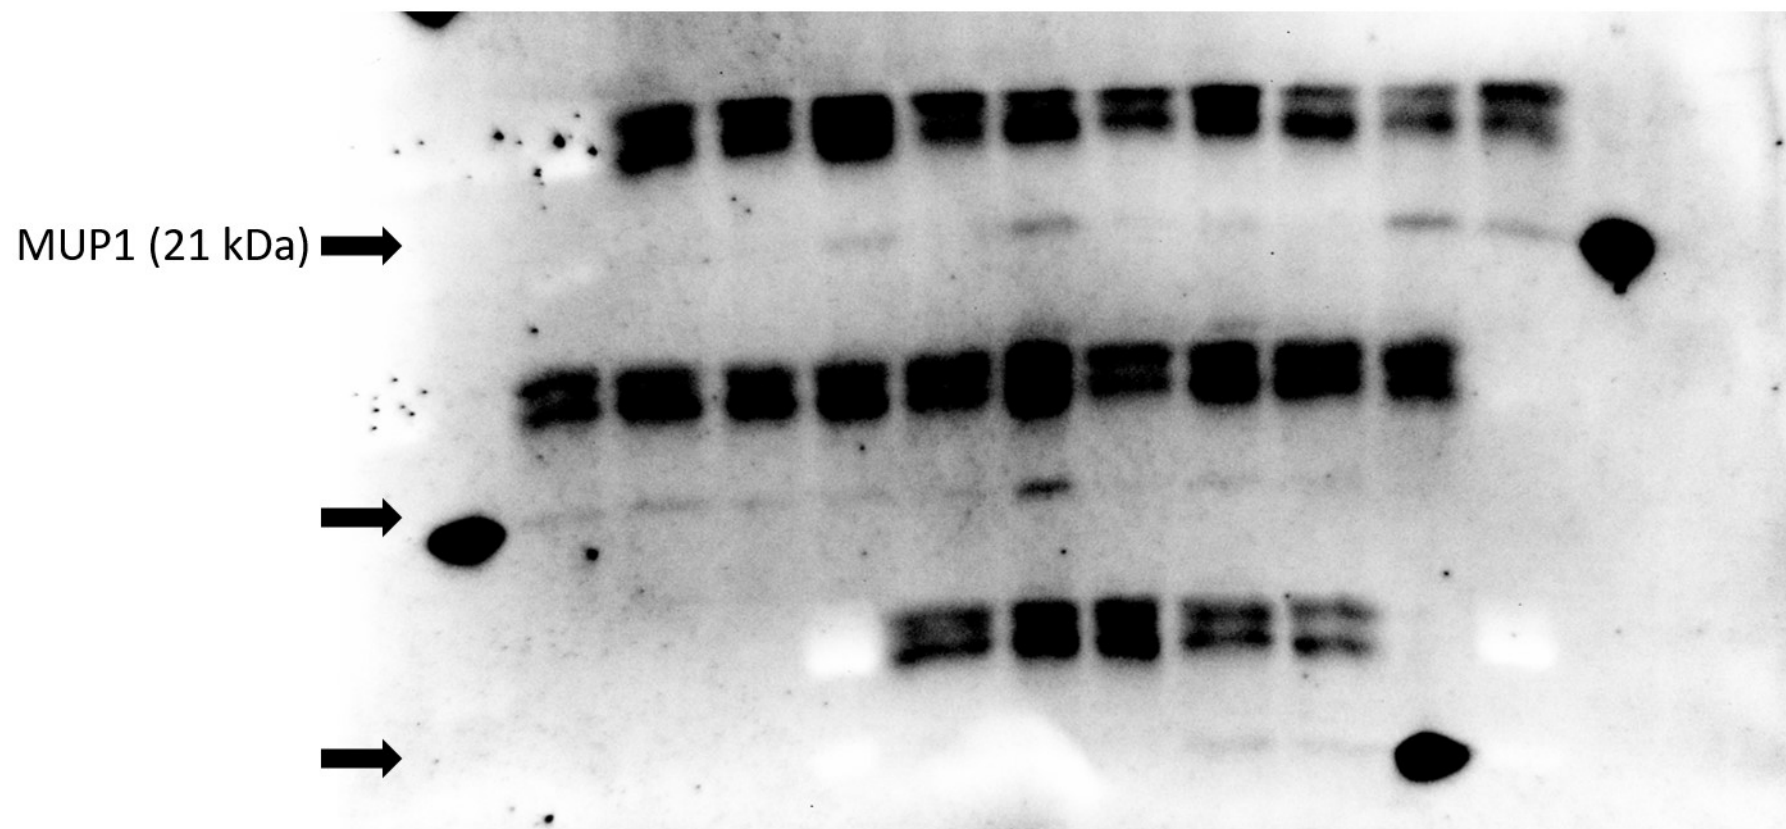

# Myoglobin

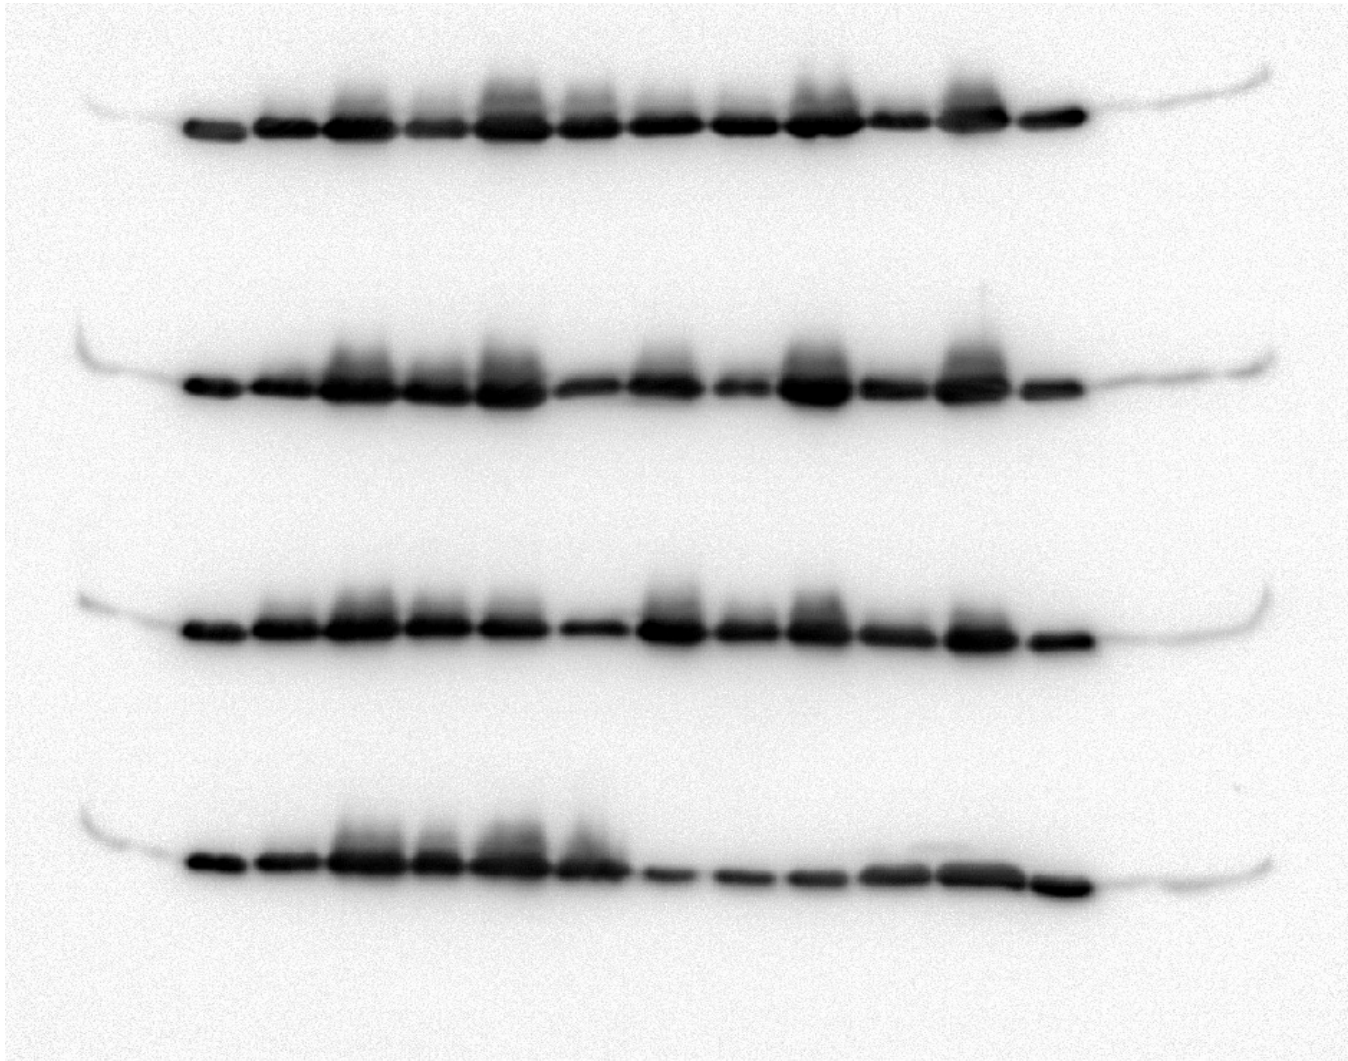



# Coomassie Stain

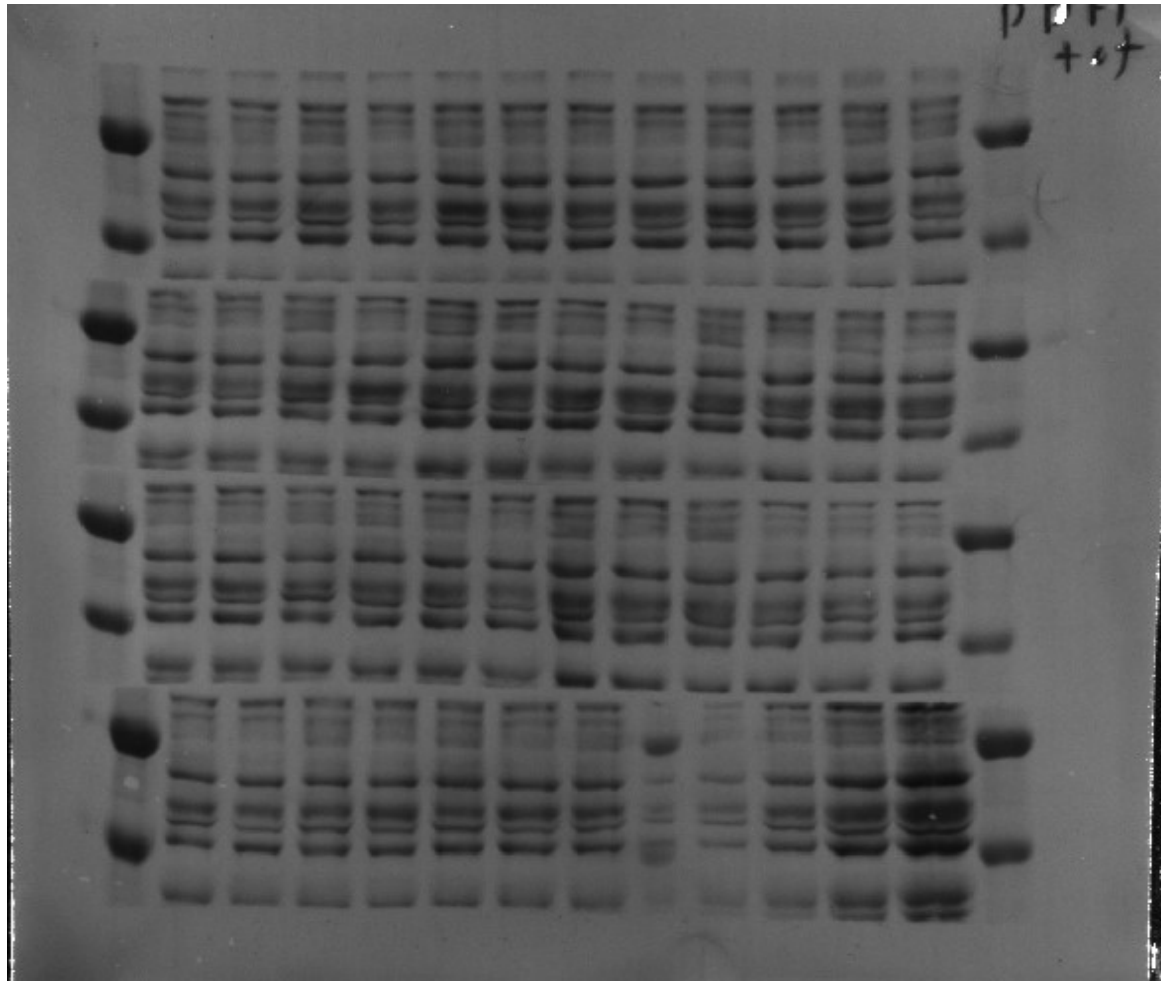

Supplement: MOESM1 [file 41598_2018_28540_MOESM1_ESM.pdf › 41598_2018_28540_MOESM1_ESM.pdf]
