# Supplementary material for: Quantitative proteomic characterization of cellular pathways associated with altered insulin sensitivity in skeletal muscle following high-fat diet feeding and exercise training
Source: Springer Nature journal article supplement (doi:10.1038/s41598-018-28540-5), 2018-07-10

**Quantitative proteomic characterization of cellular pathways associated with altered insulin sensitivity in skeletal muscle following high-fat diet feeding and exercise training**

Maximilian Kleinert<sup>1,2,3,4</sup>, Benjamin L. Parker<sup>5</sup>, Thomas E. Jensen<sup>1</sup>, Steffen H. Raun, Phung Pham<sup>2</sup>, Xiuqing Han<sup>1</sup>, David E. James<sup>5</sup>, Erik A. Richter<sup>1</sup>, Lykke Sylow<sup>1#</sup>

**Supplemental Info – Raw Blots related to Figure 5**

p-ACC

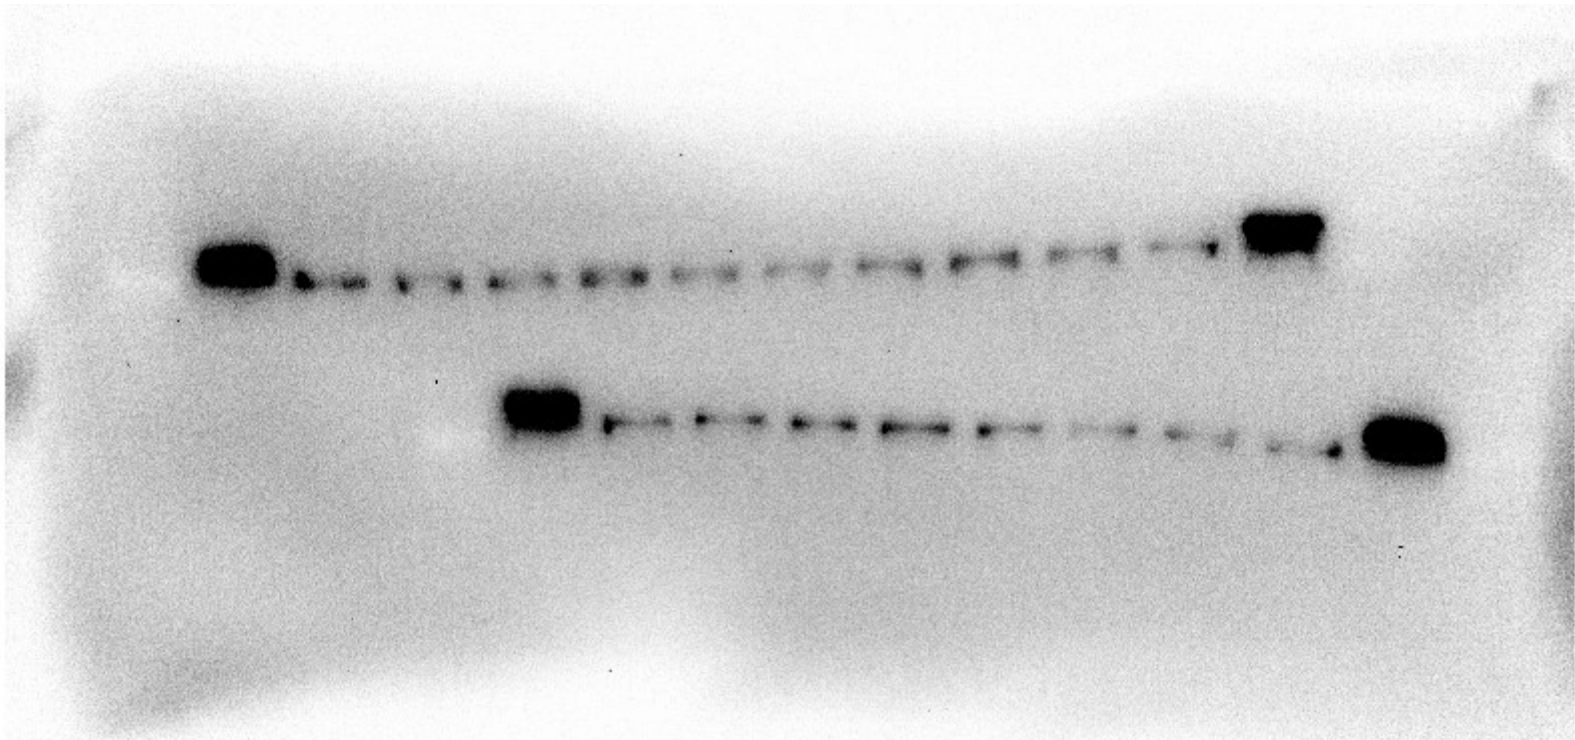

Actin

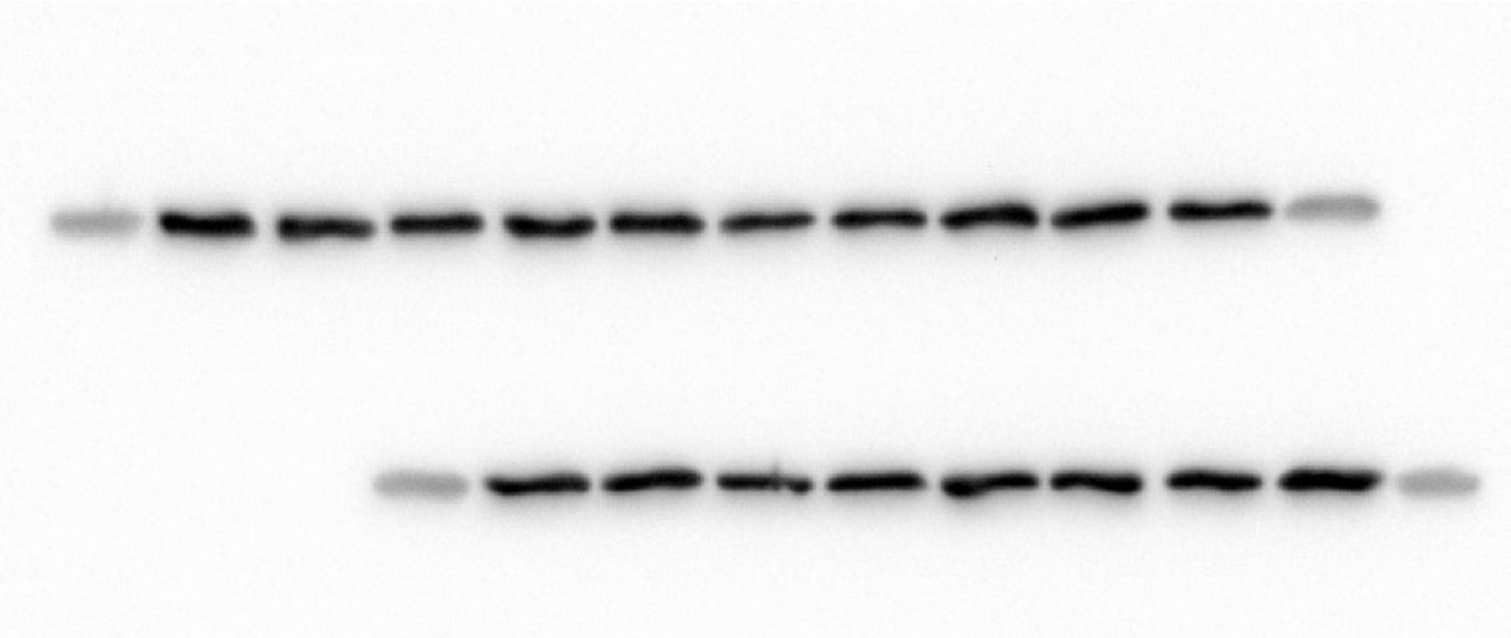

p-AKT T308

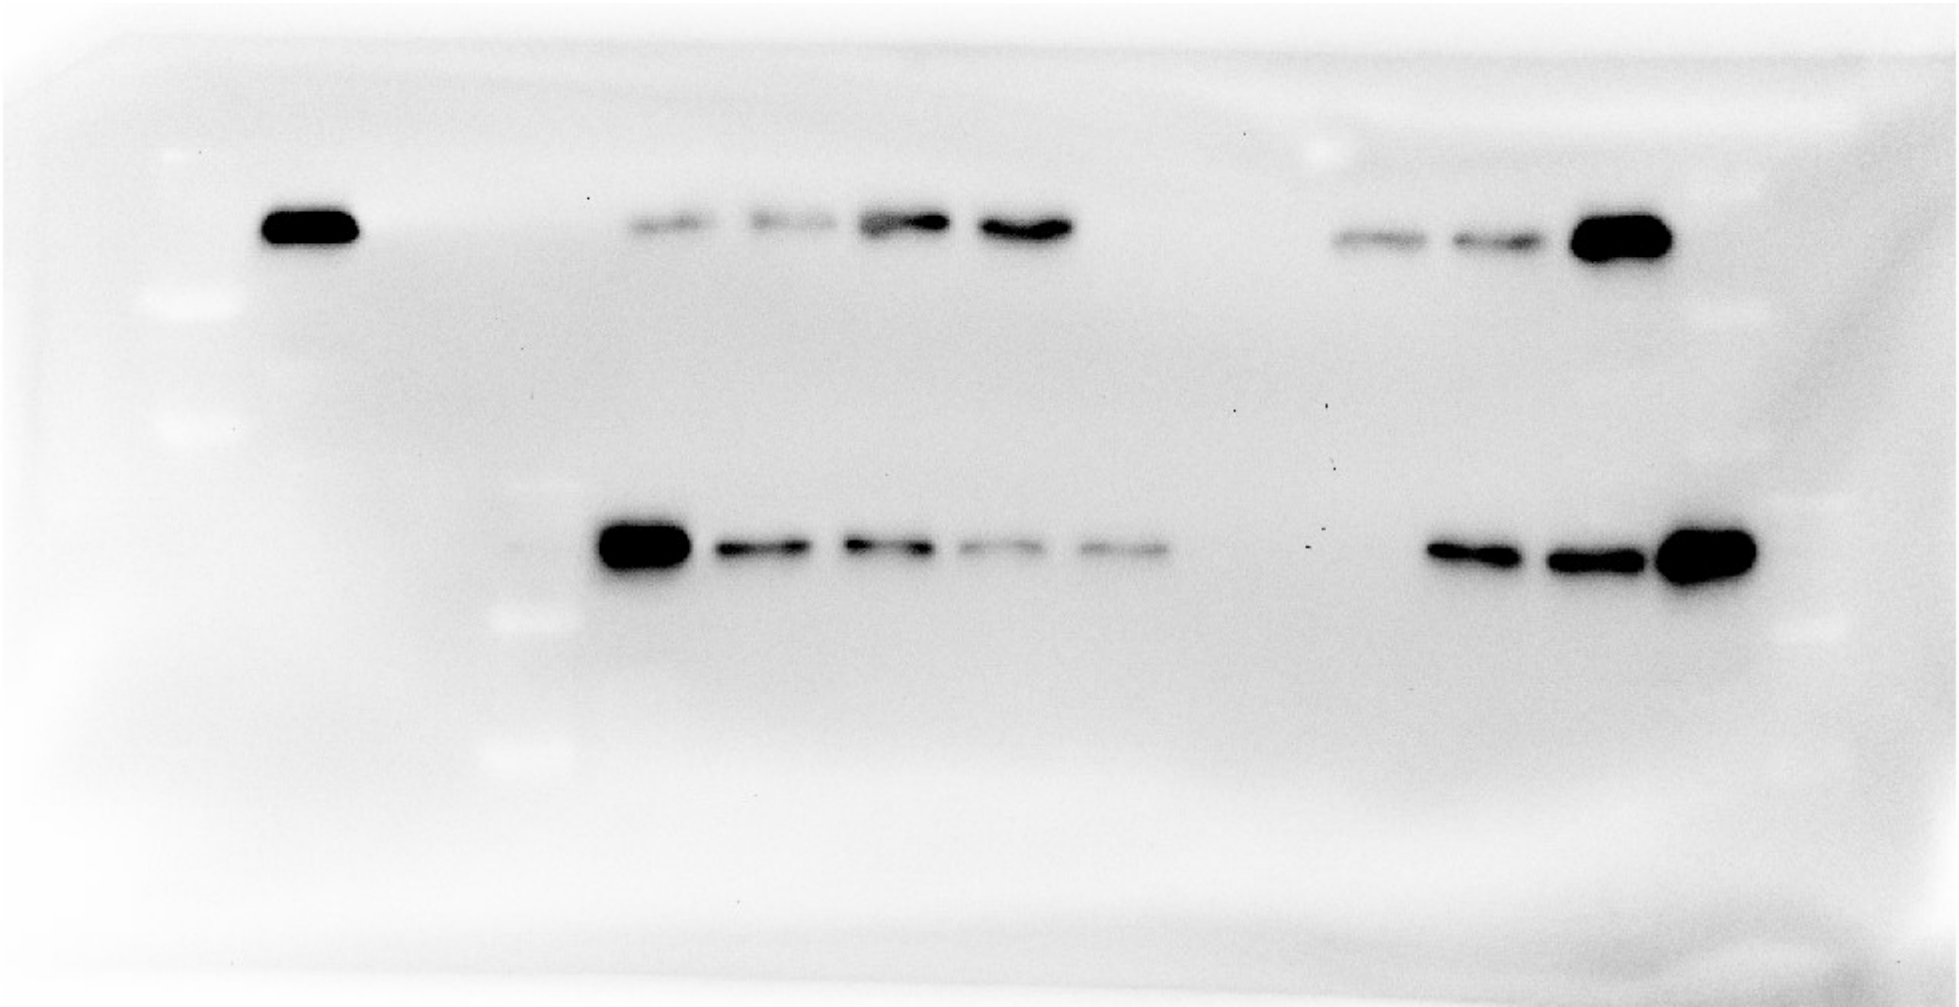

p-Akt S473

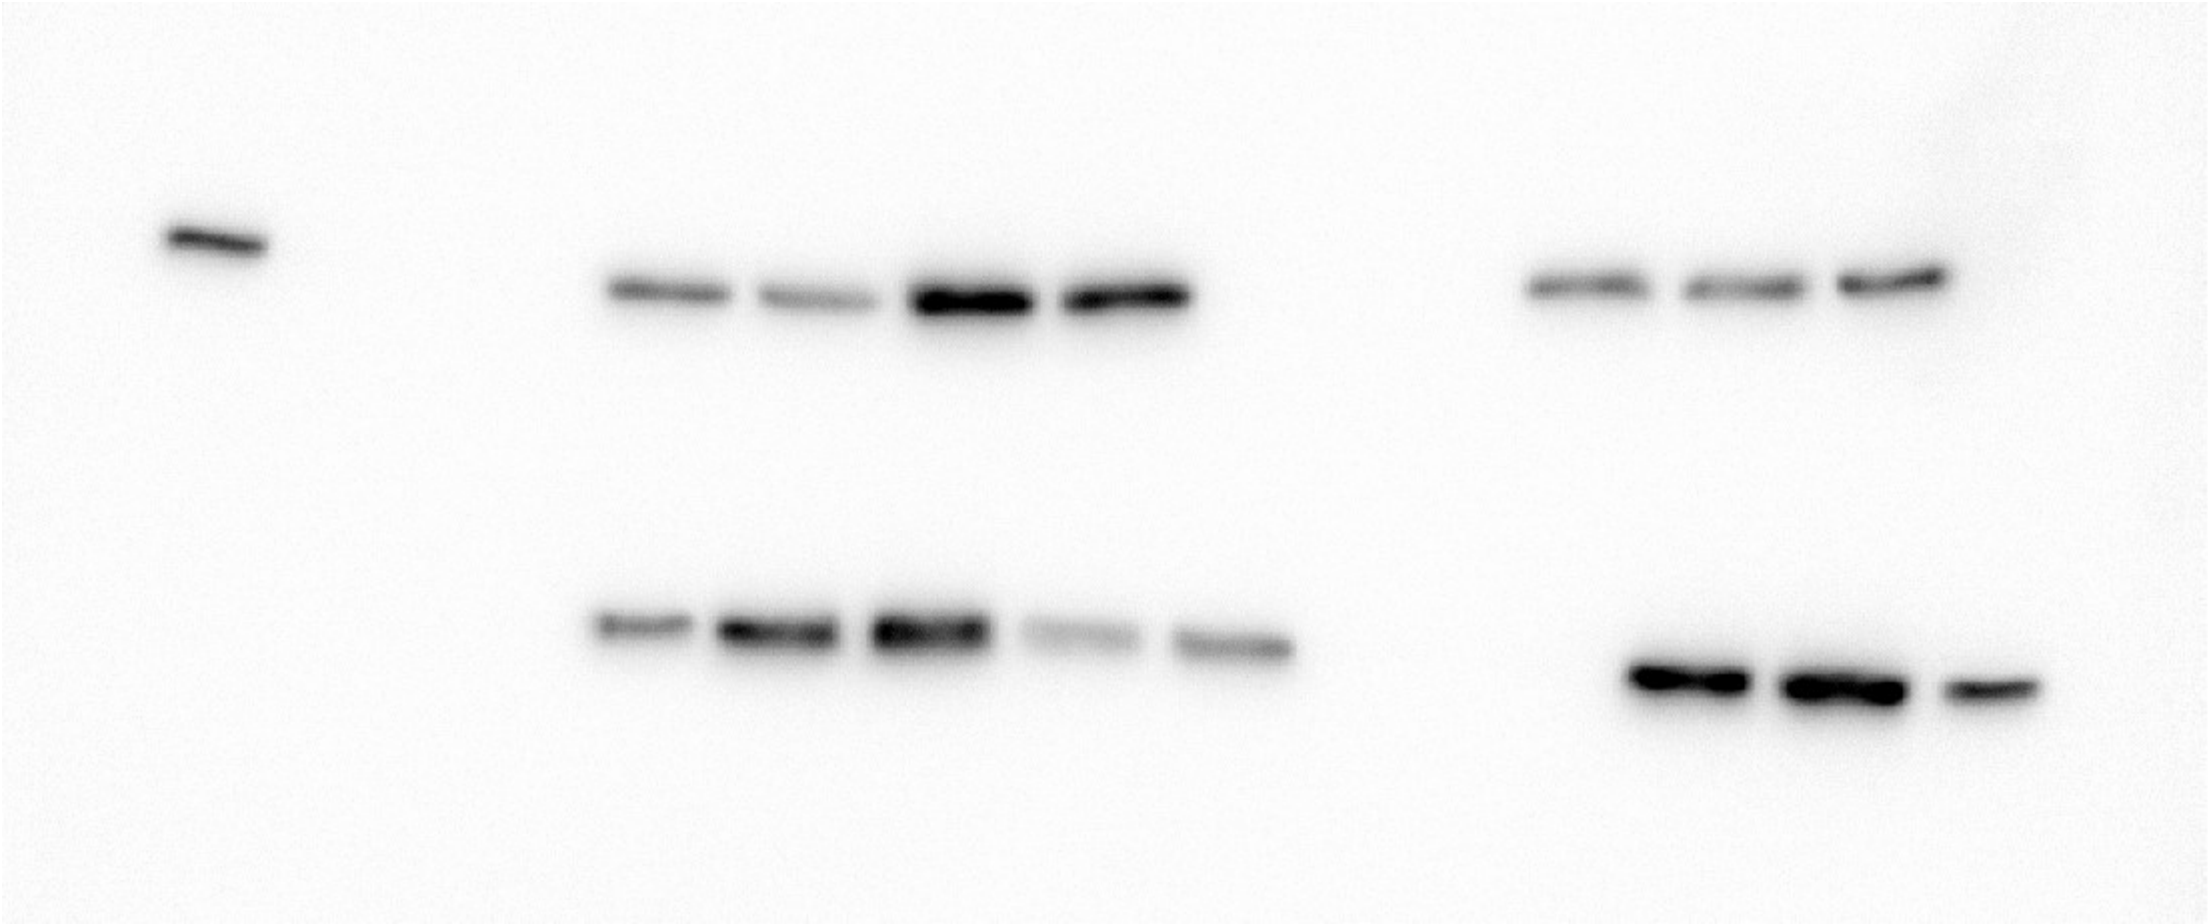

p-TBC1D4 T642

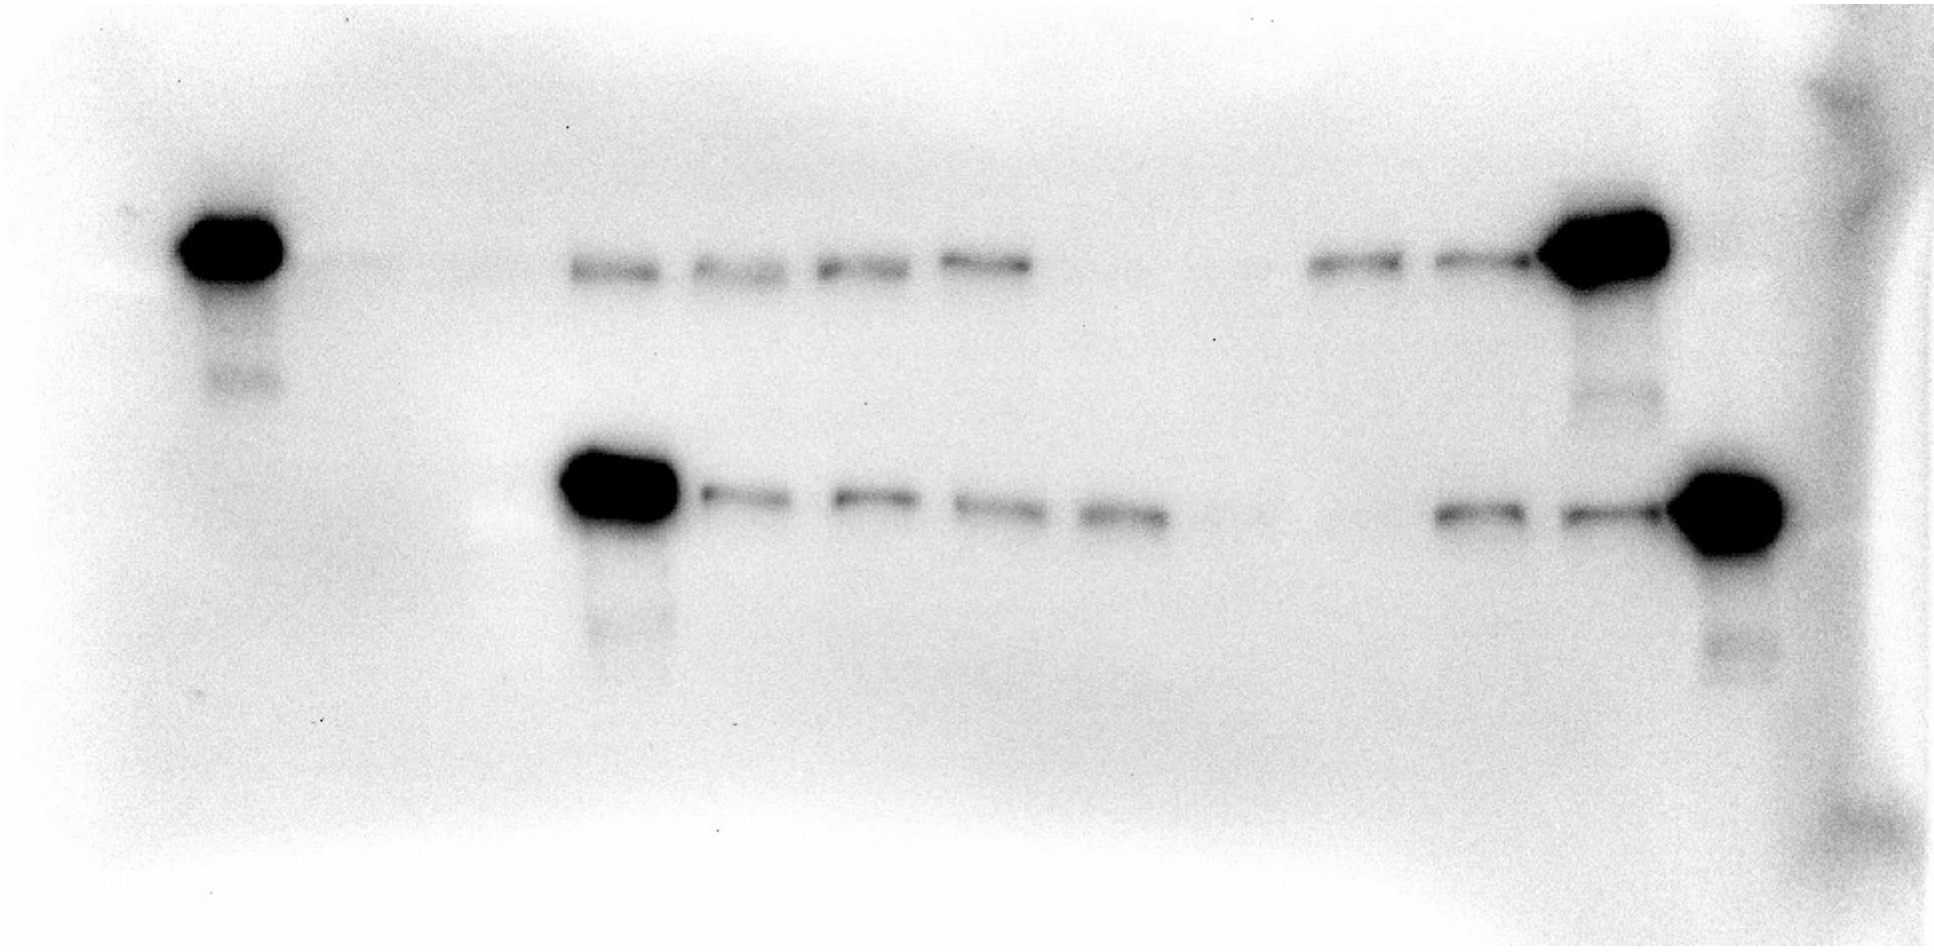

p-P38

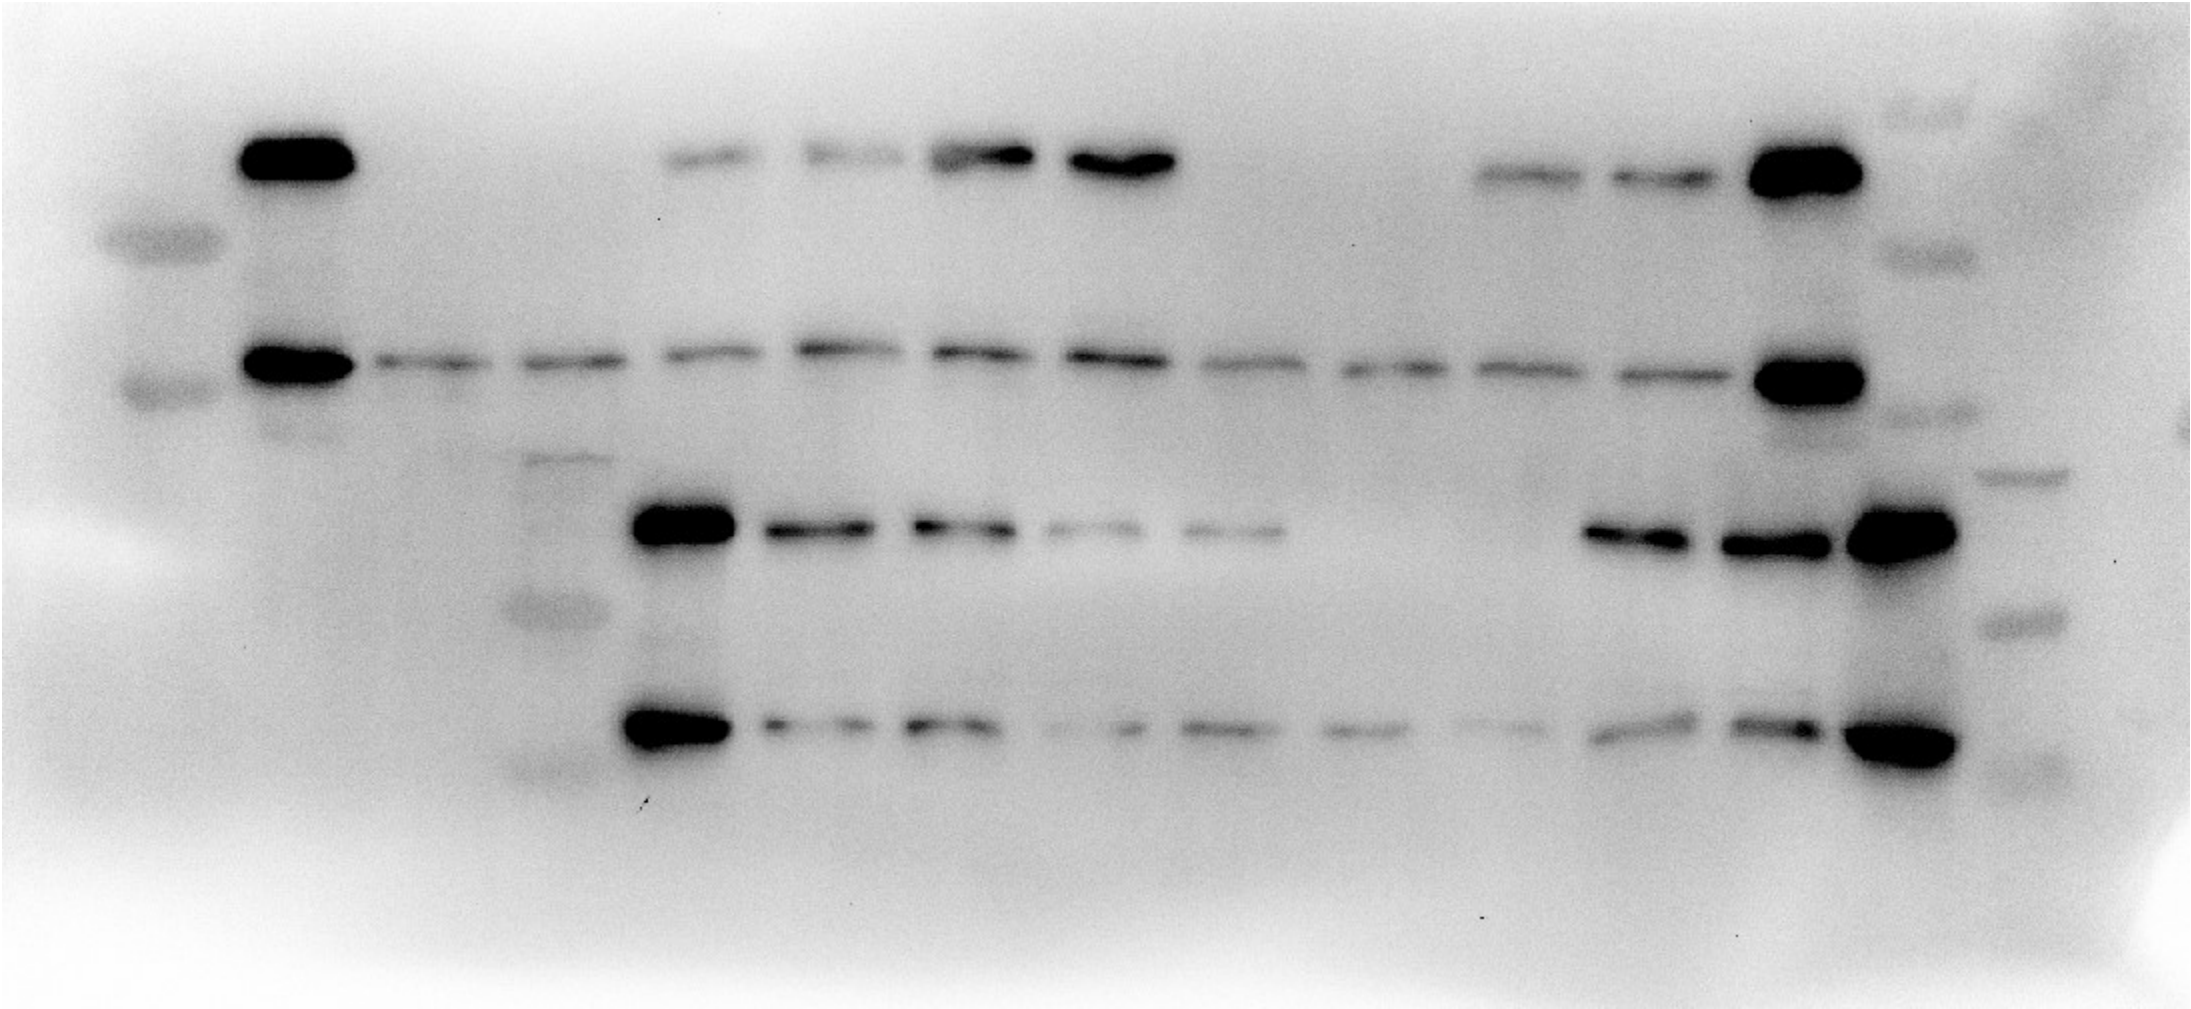

Supplement: MOESM2 [file 41598_2018_28540_MOESM2_ESM.pdf › 41598_2018_28540_MOESM2_ESM.pdf]
